# Supplementary material for: Large-scale, low-cost, broadband and tunable perfect optical absorber based on phase-change material
Source: Royal Society of Chemistry journal article supplement (doi:10.1039/c9nr07602f), 2020-01-01
Supplement: c9nr07602f1.pdf [file c9nr07602f1.pdf]

## Supporting information

### Large-scale, low-cost, broadband and tunable perfect optical absorber based on phase change material

Nanli Mou<sup>a,b</sup>, Xiaolong Liu<sup>c</sup>, Tao Wei<sup>a</sup>, Hongxing Dong<sup>a</sup>, Qiong He<sup>d,e</sup>, Lei Zhou<sup>d,e</sup>, YaQiang Zhang<sup>a,b</sup>, Long Zhang<sup>a\*</sup> and Shulin Sun<sup>c\*</sup>

- a. *Key Laboratory of Materials for High-Power Laser, Shanghai Institute of Optics and Fine Mechanics, Chinese Academy of Science, Shanghai, 201800, China.*
- b. *Center of Materials Science and Optoelectronics Engineering, University of Chinese Academy of Sciences, Beijing, 100049, China*
- c. *Shanghai Engineering Research Center of Ultra-Precision Optical Manufacturing, Green Photonics and Department of Optical Science and Engineering, Fudan University, Shanghai 200433, China.*
- d. *State Key Laboratory of Surface Physics and Key Laboratory of Micro and Nano Photonic Structures (Ministry of Education), Fudan University, Shanghai 200433, China*
- e. *Collaborative Innovation Center of Advanced Microstructures, Nanjing 210093, China*  
E-mail: [lzhang@siom.ac.cn](mailto:lzhang@siom.ac.cn); [sls@fudan.edu.cn](mailto:sls@fudan.edu.cn)

**Sample Fabrication:** While we fabricate the metamaterial absorber, a 100 nm-thick Aluminum (Al) film is first deposited onto the silica substrate. After that, a GST thin film with a well-controlled thickness is further fabricated on the Al film using a radiofrequency (RF) sputtering method. The diameter of the GST target is 4 inch with a 99.99% purity and the deposition rate is 1 Å/S with a power of 30 W. The thicknesses of GST film were determined by the calibrated deposition speed and deposition time and confirmed by AFM measurements. In the following process, an AAO template filled with the well-organized air poles is placed on the GST film. The Al nanoparticles were then constructed on the GST layer via depositing the Al film through the air poles of the AAO template. The pore diameter and inter-pore distance of AAO can be well

controlled by changing the applied voltage and oxidation time of the anodization process (see more details in Ref [1]). Finally, the AAO mask was removed to obtain the final device. In our experiments, the sputtering process of Al or GST was carried out in an argon atmosphere at a pressure of 0.5 Pa. The vacuum chamber pressure was  $2.6 \times 10^{-5}$  Pa.

**Characterization and measurement:** The morphologies of the fabricated Al NPs were characterized by scanning electron microscopy (SEM; Auriga S40, Zeiss, Oberkochen, Germany). The thickness of the Al film and GST layer were determined by the calibrated deposition and confirmed by AFM measurements. The optical constants of GST film were measured by Variable Angle Spectroscopic Ellipsometry (VASE) using a Woollam M2000 ellipsometer, and a Tauc-Lorentz model was used to fit the measured ellipsometry data. The unpolarized incident light from a tungsten halogen lamp was focused onto the sample by microscope (20x, Olympus, N.A.=0.4), and the reflected light was also collected by the microscope. The reflectance (R) of the fabricated structure at normal incidence was measured using a Si detector and InGaAs detector in the visible and near-infrared regions, respectively. For all the measurements, the incident and collected light were at normal incidence to the sample. The reflection spectra of the samples were normalized to an Al mirror, which is considered 100% reflectivity over the measured range. The absorption spectra (A) is calculated by  $A = 1 - R$ .

**Numerical Simulations:** The simulations were performed by commercial software COMSOL Multiphysics, which is based on FEM. The Al NPs were modeled as semi-ellipsoid with a 2 nm-thick homogeneous Al<sub>2</sub>O<sub>3</sub> coating, in order to take its oxidization effect into account. The relative permittivity of Al and Al<sub>2</sub>O<sub>3</sub> was obtained from Ref <sup>2,3</sup>. All the simulation results were obtained under normal incidence.

## References

- [1] K. V. Sreekanth, S. Han and R. Singh, *Adv. Mater.*, 2018, 30, 1706696.
- [2] R. Boidin, T. Halenkovič, V. Nazabal, L. Beneš and P. Němec, *Ceram. Int.*, 2016, 42, 1177–1182.
- [3] K. M. Mcpeak, S. V Jayanti, S. J. P. Kress, S. Meyer, S. Iotti, A. Rossinelli and D. J. Norris, *ACS Photonics*, 2015, 2, 326-333.
